# Supplementary material for: Reproductive success of Whiskered Tern Chlidonias hybrida in eastern Spain in relation to water level variation
Source: PeerJ. 2018 Apr 19;6:e4548. doi: 10.7717/peerj.4548 (PMC5911388; doi:10.7717/peerj.4548)
Supplement: Supplemental Information 1 — Water level fluctuation rate in 94 samplings (2002–2009). [file peerj-06-4548-s001.xlsx]

## Sheet:  Water level Fluctuation DATA 
				Cambio en el Nivel de Agua
				Change water level
	Fecha	Nº nidos	Nº nidos	Valor Inicial	Valor Final	Tiempo	Tasa	Tasa censo	Lluvia	Profundidad				% Pérdida	% Pérdida	% Pérdida
		iniciales	final	(cm)	(cm)	(días)	(cm/días)	(cm/censo)	mm	Media (cm)	AÑO	Área	Colonia	Nidos	Huevos	Pollos
		Initial Nº nest	Final Nº nest	Initial value (cm)	Final value (cm)	Time (days)	Rate (cm/day)	Rate (cm/census)	Rain (mm)	Depth (cm)	Year	Area	Colony	% Nest loss	% Eggs loss	% Chicks loss
Pego	2002-07-04	93	93	32	31	5	-0.2	-1	0	30.8	2002	Pego	1	26.9	5.3	70.5
Pego	2002-07-09	93	93	31	31	3	0	0	0	30.8	2002	Pego	1	53.9	32.8	71.9
Pego	2002-07-12	93	27	31	30	5	-0.2	-1	0	30.8	2002	Pego	1	15.6	43.6	69.2
Pego	2002-07-17	27	20	30	30	6	0	0	0	30.8	2002	Pego	1	25.9259	100	95.8
Pego	2003-06-23	64	63	77	76	4	-0.25	-1	0	74.5	2003	Pego	2	1.6	2.83	50
Pego	2003-06-27	63	62	76	76	3	0	0	0	74.5	2003	Pego	2	1.6	7.7	76.5
Pego	2003-06-30	62	61	76	75	3	-0.333333	-1	0	74.5	2003	Pego	2	1.6	8.9	38.9
Pego	2003-07-03	61	61	75	75	5	0	0	0.5	74.5	2003	Pego	2	1.6	8.3	31.8
Pego	2003-07-08	61	61	75	75	2	0	0	0	74.5	2003	Pego	2	1.6	2	27.3
Pego	2003-07-10	61	61	75	74	4	-0.25	-1	0	74.5	2003	Pego	2	1.6	26.5	30.3
Pego	2003-07-14	61	62	74	74	2	0	0	0	74.5	2003	Pego	2	0	25	1.9
Pego	2003-07-16	62	62	74	73	6	-0.166667	-1	0	74.5	2003	Pego	2	0	42.9	4.8
Pego	2003-07-22	62	62	73	73	2	0	0	0	74.5	2003	Pego	2	0	100	21
Pego	2003-07-24	62	60	73	72	7	-0.142857	-1	0	74.5	2003	Pego	2	8.6		77.7
Pego 1	2004-06-09	79	76	25	25	5	0	0	15.6	25.9	2004	Pego 1	3	3.8	6.4	16.7
Pego 1	2004-06-14	76	76	25	20	2	-2.5	-5	0	25.9	2004	Pego 1	3	0	5.3	11.4
Pego 1	2004-06-16	76	76	20	22	1	2	2	0	25.9	2004	Pego 1	3	0	4.4	16.7
Pego 1	2004-06-17	76	49	22	34	4	3	12	1.8	25.9	2004	Pego 1	3	35.5	29.6	68.1							MEDIA		MEDIA		MEDIA
Pego 1	2004-06-21	49	24	34	32	1	-2	-2	0	25.9	2004	Pego 1	3	51	8.5	61.5							% Pérdida		% Pérdida		% Pérdida
Pego 1	2004-06-22	24	17	32	30	4	-0.5	-2	0	25.9	2004	Pego 1	3	29.2	26.2	25							Nidos	Standard	Nidos	Standard	Nidos	Standard
Pego 1	2004-06-26	17	14	30	30	4	0	0	0	25.9	2004	Pego 1	3	17.6	52	100							% Nest loss	Desviation	% Nest loss	Desviation	% Nest loss	Desviation
Pego 1	2004-06-30	14	4	30	25	5	-1	-5	0	25.9	2004	Pego 1	3	71.4	25								X	SD	X	SD	X	SD
Pego 1	2004-07-05	4	2	25	20	6	-0.833333	-5	0	25.9	2004	Pego 1	3	50	100	100				1	Pego	2002	27.67	16.37	29.51	39.8	76.14	12.68
Pego 2	2004-06-22	13	11	85	75	4	-2.5	-10	0	62.5	2004	Pego 2	4	15.4	8.3	100				2	Pego	2003	1.82	2.5	24.9	31.24	36.02	25.97
Pego 2	2004-06-26	11	10	75	65	4	-2.5	-10	0	62.5	2004	Pego 2	4	10	0	0				3	Pego	2004	28.72	25.52	28.6	31.01	49.93	37.4
Pego 2	2004-06-30	10	10	65	65	5	0	0	0	62.5	2004	Pego 2	4	0	6.25	50				4	Pego	2004	17.57	15.79	14.94	21	50	44.72
Pego 2	2004-07-05	10	9	65	58	1	-7	-7	0	62.5	2004	Pego 2	4	11.1	0					5	Pego	2004	7.5	16.77	5.72	12.79	6.2	8.53
Pego 2	2004-07-06	9	7	58	52	10	-0.6	-6	0	62.5	2004	Pego 2	4	22.2	40	100				6	Hondo	2004	37.76	22.53	46.9	32.49	40.45	22.03
Pego 2	2004-07-16	7	6	52	50	7	-0.285714	-2	0	62.5	2004	Pego 2	4	14.3	0	0				7	Moro	2004	19.14	15.22	28.34	19.82	28.94	16.42
Pego 2	2004-07-23	6	3	50	50	11	0	0	0	62.5	2004	Pego 2	4	50	50	50				8	Moro	2004	8	17.89	14.3	20.22	11.1	19.23
Pego 3	2004-07-06	8	8	60	45	10	-1.5	-15	0	49.5	2004	Pego 3	5	0	0	0				9	Pego	2005	18.6	38.17	30.06	39.62	33.3
Pego 3	2004-07-16	8	8	45	52	7	1	7	0	49.5	2004	Pego 3	5	0	0	0				10	Pego	2005	19.2	42.93	30.82	39.18	15.85	2.19
Pego 3	2004-07-23	8	8	52	50	11	-0.181818	-2	2	49.5	2004	Pego 3	5	0	28.6	16.7				11	Xeresa	2005	24.80	42.15	28.72	40.04	41.63	33.04
Pego 3	2004-08-04	8	5	50	45	7	-0.714286	-5	0	49.5	2004	Pego 3	5	37.5	0	14.3				12	Moro	2005	61.65	30.62	74.55	35.99	12.5	17.68
Pego 3	2004-08-11	5	0	45	45	14	0	0	0	49.5	2004	Pego 3	5	0	0	0				13	Pego	2006	31.1	35.3	45	39.69	14.3
Hondo	2004-06-15	77	66	65	65	3	0	0	12	46	2004	Hondo	6	14.3	8.9	14.3				14	Pego	2007	50		41.2		71.4
Hondo	2004-06-18	66	56	65	60	6	-0.833333	-5	1	46	2004	Hondo	6	15.2	16.8	31.3				15	Pego	2008	90		90
Hondo	2004-06-24	56	48	60	50	5	-2	-10	0	46	2004	Hondo	6	14.3	15.7	20				16	Almenara	2008	9.72	15.28	13.15	9.58	6.18	12.01
Hondo	2004-06-29	48	31	50	40	6	-1.66667	-10	1	46	2004	Hondo	6	35.4	47.6	70				17	Pego	2009	0	0	13.6	7.64	20
Hondo	2004-07-05	31	17	40	35	5	-1	-5	1	46	2004	Hondo	6	45.2	73.3	57.1				18	Moro	2009	6.67	11.55	16.7	21.09	28.59	24.76
Hondo	2004-07-10	17	10	35	35	8	0	0	0	46	2004	Hondo	6	41.1	42.9	50							25.5953	21.7869	32.0561	27.575	31.9135	21.2815
Hondo	2004-07-18	10	3	35	34	8	-0.125	-1	0	46	2004	Hondo	6	70	70
Hondo	2004-07-26	3	1	34	34	9	0	0	0	46	2004	Hondo	6	66.6	100
Moro 1	2004-07-02	50	50	38	35	4	-0.75	-3	0	35.1	2004	Moro 1	7	0	0	0
Moro 1	2004-07-06	50	44	35	40	3	1.66667	5	5	35.1	2004	Moro 1	7	12	16.6	21.7
Moro 1	2004-07-09	44	36	40	35	4	-1.25	-5	3	35.1	2004	Moro 1	7	18.2	31.3	50
Moro 1	2004-07-13	36	34	35	30	3	-1.66667	-5	0	35.1	2004	Moro 1	7	5.6	18.4	21.1
Moro 1	2004-07-16	34	20	30	35	4	1.25	5	0	35.1	2004	Moro 1	7	41.2	57.1	43.5
Moro 1	2004-07-20	20	12	35	35	3	0	0	1	35.1	2004	Moro 1	7	40	25	18.8
Moro 1	2004-07-23	12	9	35	34	7	-0.142857	-1	0	35.1	2004	Moro 1	7	25	50	36.4
Moro 1	2004-07-30	9	8	34	34	5	0	0	0	35.1	2004	Moro 1	7	11.1		40
Moro 2	2004-07-06	5	5	35	30	10	-0.5	-5	0	28.2	2004	Moro 2	8	0	0	0
Moro 2	2004-07-16	5	5	30	28	4	-0.5	-2	0	28.2	2004	Moro 2	8	0	28.6	0
Moro 2	2004-07-20	5	3	28	26	3	-0.666667	-2	1	28.2	2004	Moro 2	8	40		0
Moro 2	2004-07-23	3	3	26	26	7	0	0	1	28.2	2004	Moro 2	8	0		11.1
Moro 2	2004-07-30	3	0	26	24	5	-0.4	-2	0	28.2	2004	Moro 2	8	0		44.4
Pego 1	2005-06-03	13	15	45	43	5	-0.4	-2	0	40.9	2005	Pego 1	9	0	20
Pego 1	2005-06-08	15	16	43	42	7	-0.142857	-1	11	40.9	2005	Pego 1	9	0	3.7
Pego 1	2005-06-15	16	16	42	39	6	-0.5	-3	0	40.9	2005	Pego 1	9	0	9.4
Pego 1	2005-06-21	16	15	39	37	4	-0.5	-2	0	40.9	2005	Pego 1	9	6.3	17.2
Pego 1	2005-06-25	15	2	37	37	11	0	0	0	40.9	2005	Pego 1	9	86.7	100	33.3
Pego 2	2005-06-03	21	24	85	80	5	-1	-5	0	74.7	2005	Pego 2	10	0	19
Pego 2	2005-06-08	24	24	80	70	7	-1.42857	-10	11	74.7	2005	Pego 2	10	0	12.5
Pego 2	2005-06-15	24	24	70	69	6	-0.166667	-1	0	74.7	2005	Pego 2	10	0	3.6
Pego 2	2005-06-21	24	25	69	69	4	0	0	0	74.7	2005	Pego 2	10	0	19	14.3
Pego 2	2005-06-25	25	0	69	75	11	0.545455	6	0	74.7	2005	Pego 2	10	96	100	17.4
Xeresa	2005-06-03	65	104	25	20	5	-1	-5	0	18	2005	Xeresa	11	10.8	13.8
Xeresa	2005-06-08	104	103	20	20	7	0	0	0	18	2005	Xeresa	11	2.1	4.2	50
Xeresa	2005-06-15	103	107	20	15	6	-0.833333	-5	0	18	2005	Xeresa	11	5.5	12.2	36.8
Xeresa	2005-06-21	107	114	15	10	4	-1.25	-5	0	18	2005	Xeresa	11	5.6	13.4	0
Xeresa	2005-06-25	114	0	10	5	11	-0.454545	-5	0	18	2005	Xeresa	11	100	100	79.7
Moro	2005-07-06	30	18	47	46	5	-0.2	-1	5	46.7	2005	Moro	12	40	49.1	25
Moro	2005-07-11	18	3	46	47	9	0.111111	1	7.5	46.7	2005	Moro	12	83.3	100	0
Pego	2006-05-12	11	11	75	76	7	0.142857	1	0	76.1	2006	Pego	13	8.3
Pego	2006-05-19	11	10	76	80	7	0.571429	4	0	76.1	2006	Pego	13	9.1	25
Pego	2006-05-26	10	0	80	85	5	1	5	0	76.1	2006	Pego	13	100	100
Pego	2006-06-01	0	16	85	80	2	-2.5	-5	0	76.1	2006	Pego	13	11.1	0
Pego	2006-06-03	16	12	80	75	8	-0.625	-5	2	76.1	2006	Pego	13	25	36.7
Pego	2006-06-11	12	11	75	75	4	0	0	0	76.1	2006	Pego	13	8.3	15.8
Pego	2006-06-15	11	3	75	72	4	-0.75	-3	0.4	76.1	2006	Pego	13	72.7	37.5
Pego	2006-06-19	3	0	72	67	8	-0.625	-5	0	76.1	2006	Pego	13	14.3	100	14.3
Pego	2007-06-22	38	19	40	49	6	1.5	9	21	44.5	2007	Pego	14	50	41.2	71.4
Pego	2008-06-03	10	1	42	50	8	1	8	63.9	46	2008	Pego	15	90	90
Almenara	2008-06-18	12	12	30	28	6	-0.333333	-2	0	26.6	2008	Almenara	16	0	0	0
Almenara	2008-06-24	12	12	28	28	9	0	0	0	26.6	2008	Almenara	16	0	14.8	0
Almenara	2008-07-03	12	8	28	27	4	-0.25	-1	0	26.6	2008	Almenara	16	33.3	14.8	0
Almenara	2008-07-07	8	8	27	25	10	-0.2	-2	0	26.6	2008	Almenara	16	0	23	0
Almenara	2008-07-17	8	6	25	24	4	-0.25	-1	9	26.6	2008	Almenara	16	25		30
Almenara	2008-07-21	6	6	24	24	4	0	0	0	26.6	2008	Almenara	16	0		7.1
Pego	2009-06-06	30	30	64	63	3	-0.333333	-1	0	65.3	2009	Pego	17	0	8.2
Pego	2009-06-09	30	30	63	69	7	0.857143	6	0	65.3	2009	Pego	17	0	19	20
Moro	2009-06-19	20	16	30	28	6	-0.333333	-2	0	29	2009	Moro	18	20	40.4	42.9
Moro	2009-06-25	16	16	28	29	5	0.2	1	0	29	2009	Moro	18	0	9.7	0
Moro	2009-06-30	16	16	29	30	8	0.125	1	0	29	2009	Moro	18	0	0	42.86

## Sheet: Means and SD
				% Pérdida	% Pérdida	% Pérdida												% Pérdida	% Pérdida	% Pérdida
	AÑO	Área	Colonia	Nidos	Huevos	Pollos												Nidos	Huevos	Pollos
	Year	Area	Colony	% Nest loss	% Eggs loss	% Chicks loss												% Nest loss	% Eggs loss	% Chicks loss
	2002	Pego	1	26.9	5.3	70.5					% Pérdida	% Pérdida	% Pérdida			2002	Pego	26.9	5.3	70.5
	2002	Pego	1	53.9	32.8	71.9		AÑO	Área	Colonia	Nidos	Huevos	Pollos			2002	Pego	53.9	32.8	71.9
	2002	Pego	1	15.6	43.6	69.2		Year	Area	Colony	% Nest loss	% Eggs loss	% Chicks loss			2002	Pego	15.6	43.6	69.2
	2002	Pego	1	25.9	100	95.8										2002	Pego	25.9	100	95.8
	2003	Pego	2	1.6	2.83	50		2003	Pego	2	1.6	2.83	50					16.3673	39.796	12.6814	SD
	2003	Pego	2	1.6	7.7	76.5		2003	Pego	2	1.6	7.7	76.5
	2003	Pego	2	1.6	8.9	38.9		2003	Pego	2	1.6	8.9	38.9
	2003	Pego	2	1.6	8.3	31.8		2003	Pego	2	1.6	8.3	31.8
	2003	Pego	2	1.6	2	27.3		2003	Pego	2	1.6	2	27.3
	2003	Pego	2	1.6	26.5	30.3		2003	Pego	2	1.6	26.5	30.3
	2003	Pego	2	0	25	1.9		2003	Pego	2	0	25	1.9
	2003	Pego	2	0	42.9	4.8		2003	Pego	2	0	42.9	4.8
	2003	Pego	2	0	100	21		2003	Pego	2	0	100	21
	2003	Pego	2	8.6		77.7		2003	Pego	2	8.6		77.7
	2004	Pego 1	3	3.8	6.4	16.7					1.82	24.9033	36.02	Media
	2004	Pego 1	3	0	5.3	11.4					2.4988	31.2359	25.9714	SD
	2004	Pego 1	3	0	4.4	16.7									% Nest loss	% Eggs loss	% Chicks loss
	2004	Pego 1	3	35.5	29.6	68.1									Pego 1	Pego 1	Pego 1
	2004	Pego 1	3	51	8.5	61.5		2004	Pego 1	3	3.8	6.4	16.7		3.8	6.4	16.7	% Nest loss	% Eggs loss	% Chicks loss
	2004	Pego 1	3	29.2	26.2	25		2004	Pego 1	3	0	5.3	11.4		0	5.3	11.4	Pego 2	Pego 2	Pego 2
	2004	Pego 1	3	17.6	52	100		2004	Pego 1	3	0	4.4	16.7		0	4.4	16.7	15.4	8.3	100	% Nest loss	% Eggs loss	% Chicks loss
	2004	Pego 1	3	71.4	25			2004	Pego 1	3	35.5	29.6	68.1		35.5	29.6	68.1	10	0	0	Pego 3	Pego 3	Pego 3
	2004	Pego 1	3	50	100	100		2004	Pego 1	3	51	8.5	61.5		51	8.5	61.5	0	6.25	50	0	0	0
	2004	Pego 2	4	15.4	8.3	100		2004	Pego 1	3	29.2	26.2	25		29.2	26.2	25	11.1	0		0	0	0
	2004	Pego 2	4	10	0	0		2004	Pego 1	3	17.6	52	100		17.6	52	100	22.2	40	100	0	28.6	16.7
	2004	Pego 2	4	0	6.25	50		2004	Pego 1	3	71.4	25			71.4	25		14.3	0	0	37.5	0	14.3
	2004	Pego 2	4	11.1	0			2004	Pego 1	3	50	100	100		50	100	100	50	50	50	0	0	0
	2004	Pego 2	4	22.2	40	100		2004	Pego 2	4	15.4	8.3	100		28.7222	28.6	49.925	17.5714	14.9357	50	7.5	5.72	6.2
	2004	Pego 2	4	14.3	0	0		2004	Pego 2	4	10	0	0		25.5229	31.0053	37.4024	15.7925	21.0017	44.7214	16.7705	12.7903	8.532
	2004	Pego 2	4	50	50	50		2004	Pego 2	4	0	6.25	50
	2004	Pego 3	5	0	0	0		2004	Pego 2	4	11.1	0
	2004	Pego 3	5	0	0	0		2004	Pego 2	4	22.2	40	100
	2004	Pego 3	5	0	28.6	16.7		2004	Pego 2	4	14.3	0	0
	2004	Pego 3	5	37.5	0	14.3		2004	Pego 2	4	50	50	50
	2004	Pego 3	5	0	0	0		2004	Pego 3	5	0	0	0
	2004	Hondo	6	14.3	8.9	14.3		2004	Pego 3	5	0	0	0												% Pérdida		% Pérdida		% Pérdida
	2004	Hondo	6	15.2	16.8	31.3		2004	Pego 3	5	0	28.6	16.7												Nidos	Standard	Nidos	Standard	Nidos	Standard
	2004	Hondo	6	14.3	15.7	20		2004	Pego 3	5	37.5	0	14.3												% Nest loss	Desviation	% Nest loss	Desviation	% Nest loss	Desviation
	2004	Hondo	6	35.4	47.6	70		2004	Pego 3	5	0	0	0												X	SD	X	SD	X	SD
	2004	Hondo	6	45.2	73.3	57.1					19.9524	18.5976	38.4421	X								1	Pego	2002	27.67	16.37	29.51	39.8	76.14	12.68
	2004	Hondo	6	41.1	42.9	50					21.6101	25.3129	38.8286	SD								2	Pego	2003	1.82	2.5	24.9	31.24	36.02	25.97
	2004	Hondo	6	70	70																	3	Pego	2004	28.72	25.52	28.6	31.01	49.93	37.4
	2004	Hondo	6	66.6	100			2004	Hondo	6	14.3	8.9	14.3									4	Pego	2004	17.57	15.79	14.94	21	50	44.72
	2004	Moro 1	7	0	0	0		2004	Hondo	6	15.2	16.8	31.3									5	Pego	2004	7.5	16.77	5.72	12.79	6.2	8.53
	2004	Moro 1	7	12	16.6	21.7		2004	Hondo	6	14.3	15.7	20									6	Hondo	2004	37.76	22.53	46.9	32.49	40.45	22.03
	2004	Moro 1	7	18.2	31.3	50		2004	Hondo	6	35.4	47.6	70									7	Moro	2004	19.14	15.22	28.34	19.82	28.94	16.42
	2004	Moro 1	7	5.6	18.4	21.1		2004	Hondo	6	45.2	73.3	57.1									8	Moro	2004	8	17.89	14.3	20.22	11.1	19.23
	2004	Moro 1	7	41.2	57.1	43.5		2004	Hondo	6	41.1	42.9	50									9	Pego	2005	18.6	38.17	30.06	39.62	33.3
	2004	Moro 1	7	40	25	18.8		2004	Hondo	6	70	70										10	Pego	2005	19.2	42.93	30.82	39.18	15.85	2.19
	2004	Moro 1	7	25	50	36.4		2004	Hondo	6	66.6	100										11	Xeresa	2005	24.80	42.15	28.72	40.04	41.63	33.04
	2004	Moro 1	7	11.1		40					37.7625	46.9	40.45	X								12	Moro	2005	61.65	30.62	74.55	35.99	12.5	17.68
	2004	Moro 2	8	0	0	0					22.5292	32.492	22.0335	SD	% Nest loss	% Eggs loss	% Chicks loss					13	Pego	2006	31.1	35.3	45	39.69	14.3
	2004	Moro 2	8	0	28.6	0									Moro 1	Moro 1	Moro 1					14	Pego	2007	50		41.2		71.4
	2004	Moro 2	8	40		0		2004	Moro 1	7	0	0	0		0	0	0					15	Pego	2008	90		90
	2004	Moro 2	8	0		11.1		2004	Moro 1	7	12	16.6	21.7		12	16.6	21.7	% Nest loss	% Eggs loss	% Chicks loss		16	Almenara	2008	9.72	15.28	13.15	9.58	6.18	12.01
	2004	Moro 2	8	0		44.4		2004	Moro 1	7	18.2	31.3	50		18.2	31.3	50	Moro 2	Moro 2	Moro 2		17	Pego	2009	0	0	13.6	7.64	20
	2005	Pego 1	9	0	20			2004	Moro 1	7	5.6	18.4	21.1		5.6	18.4	21.1	0	0	0		18	Moro	2009	6.67	11.55	16.7	21.09	28.59	24.76
	2005	Pego 1	9	0	3.7			2004	Moro 1	7	41.2	57.1	43.5		41.2	57.1	43.5	0	28.6	0					25.5953	21.7869	32.0561	27.575	31.9135	21.2815
	2005	Pego 1	9	0	9.4			2004	Moro 1	7	40	25	18.8		40	25	18.8	40		0
	2005	Pego 1	9	6.3	17.2			2004	Moro 1	7	25	50	36.4		25	50	36.4	0		11.1
	2005	Pego 1	9	86.7	100	33.3		2004	Moro 1	7	11.1		40		11.1		40	0		44.4
	2005	Pego 2	10	0	19			2004	Moro 2	8	0	0	0		19.1375	28.3429	28.9375	8	14.3	11.1
	2005	Pego 2	10	0	12.5			2004	Moro 2	8	0	28.6	0		15.2236	19.8158	16.4218	17.8885	20.2233	19.2258
	2005	Pego 2	10	0	3.6			2004	Moro 2	8	40		0
	2005	Pego 2	10	0	19	14.3		2004	Moro 2	8	0		11.1
	2005	Pego 2	10	96	100	17.4		2004	Moro 2	8	0		44.4
	2005	Xeresa	11	10.8	13.8						14.8538	25.2222	22.0769	X
	2005	Xeresa	11	2.1	4.2	50					16.5428	19.5951	19.029	SD
	2005	Xeresa	11	5.5	12.2	36.8
	2005	Xeresa	11	5.6	13.4	0		2005	Pego 1	9	0	20
	2005	Xeresa	11	100	100	79.7		2005	Pego 1	9	0	3.7
	2005	Moro	12	40	49.1	25		2005	Pego 1	9	0	9.4
	2005	Moro	12	83.3	100	0		2005	Pego 1	9	6.3	17.2
	2006	Pego	13	8.3				2005	Pego 1	9	86.7	100	33.3		0	20		0	19
	2006	Pego	13	9.1	25			2005	Pego 2	10	0	19			0	3.7		0	12.5
	2006	Pego	13	100	100			2005	Pego 2	10	0	12.5			0	9.4		0	3.6
	2006	Pego	13	11.1	0			2005	Pego 2	10	0	3.6			6.3	17.2		0	19	14.3
	2006	Pego	13	25	36.7			2005	Pego 2	10	0	19	14.3		86.7	100	33.3	96	100	17.4
	2006	Pego	13	8.3	15.8			2005	Pego 2	10	96	100	17.4		18.6	30.06	33.3	19.2	30.82	15.85
	2006	Pego	13	72.7	37.5						18.9	30.44	21.6667	X	38.1667	39.6228	#DIV/0!	42.9325	39.185	2.19203
	2006	Pego	13	14.3	100	14.3					38.2978	37.1531	10.1933	SD
	2007	Pego	14	50	41.2	71.4
	2008	Pego	15	90	90
	2008	Almenara	16	0	0	0		2005	Xeresa	11	10.8	13.8
	2008	Almenara	16	0	14.8	0		2005	Xeresa	11	2.1	4.2	50
	2008	Almenara	16	33.3	14.8	0		2005	Xeresa	11	5.5	12.2	36.8
	2008	Almenara	16	0	23	0		2005	Xeresa	11	5.6	13.4	0
	2008	Almenara	16	25		30		2005	Xeresa	11	100	100	79.7
	2008	Almenara	16	0		7.1					24.8	28.72	41.625	X
	2009	Pego	17	0	8.2						42.1529	40.0384	33.0443	SD
	2009	Pego	17	0	19	20
	2009	Moro	18	20	40.4	42.9		2005	Moro	12	40	49.1	25
	2009	Moro	18	0	9.7	0		2005	Moro	12	83.3	100	0
	2009	Moro	18	0	0	42.86					61.65	74.55	12.5	X
											30.6177	35.9917	17.6777	SD
								2006	Pego	13	8.3
								2006	Pego	13	9.1	25
								2006	Pego	13	100	100
								2006	Pego	13	11.1	0
								2006	Pego	13	25	36.7
								2006	Pego	13	8.3	15.8
								2006	Pego	13	72.7	37.5
								2006	Pego	13	14.3	100	14.3
											31.1	45	14.3	X
											35.2965	39.6921		SD
								2007	Pego	14	50	41.2	71.4	X
								2008	Pego	15	90	90		X
								2008	Almenara	16	0	0	0
								2008	Almenara	16	0	14.8	0
								2008	Almenara	16	33.3	14.8	0
								2008	Almenara	16	0	23	0
								2008	Almenara	16	25		30
								2008	Almenara	16	0		7.1
											9.71667	13.15	6.18333	X
											15.2801	9.58106	12.0084	SD
								2009	Pego	17	0	8.2
								2009	Pego	17	0	19	20
											0	13.6	20	X
											0	7.63675		SD
								2009	Moro	18	20	40.4	42.9
								2009	Moro	18	0	9.7	0
								2009	Moro	18	0	0	42.86
											6.66667	16.7	28.5867	X
											11.547	21.09	24.7568	SD

## Sheet: Water leves fluctuatios RATE
		Tasa
		(cm/días)	AÑO	Área	Colonia
		Rate (cm/day)	Year	Area	Colony
		-0.2	2002	Pego	1
		0	2002	Pego	1
		-0.2	2002	Pego	1
		0	2002	Pego	1
		-0.25	2003	Pego	2
		0	2003	Pego	2
		-0.333333	2003	Pego	2
		0	2003	Pego	2
		0	2003	Pego	2
		-0.25	2003	Pego	2
		0	2003	Pego	2
		-0.166667	2003	Pego	2
		0	2003	Pego	2
		-0.142857	2003	Pego	2
		0	2004	Pego 1	3
		-2.5	2004	Pego 1	3
		2	2004	Pego 1	3
		3	2004	Pego 1	3
		-2	2004	Pego 1	3
		-0.5	2004	Pego 1	3
		0	2004	Pego 1	3
		-1	2004	Pego 1	3
		-0.833333	2004	Pego 1	3
		-2.5	2004	Pego 2	4
		-2.5	2004	Pego 2	4
		0	2004	Pego 2	4
		-7	2004	Pego 2	4
		-0.6	2004	Pego 2	4
		-0.285714	2004	Pego 2	4
		0	2004	Pego 2	4
		-1.5	2004	Pego 3	5
		1	2004	Pego 3	5
		-0.181818	2004	Pego 3	5
		-0.714286	2004	Pego 3	5
		0	2004	Pego 3	5
		0	2004	Hondo	6
		-0.833333	2004	Hondo	6
		-2	2004	Hondo	6
		-1.66667	2004	Hondo	6
		-1	2004	Hondo	6
		0	2004	Hondo	6
		-0.125	2004	Hondo	6
		0	2004	Hondo	6
		-0.75	2004	Moro 1	7
		1.66667	2004	Moro 1	7
		-1.25	2004	Moro 1	7
		-1.66667	2004	Moro 1	7
		1.25	2004	Moro 1	7
		0	2004	Moro 1	7
		-0.142857	2004	Moro 1	7
		0	2004	Moro 1	7
		-0.5	2004	Moro 2	8
		-0.5	2004	Moro 2	8
		-0.666667	2004	Moro 2	8
		0	2004	Moro 2	8
		-0.4	2004	Moro 2	8
		-0.4	2005	Pego 1	9
		-0.142857	2005	Pego 1	9
		-0.5	2005	Pego 1	9
		-0.5	2005	Pego 1	9
		0	2005	Pego 1	9
		-1	2005	Pego 2	10
		-1.42857	2005	Pego 2	10
		-0.166667	2005	Pego 2	10
		0	2005	Pego 2	10
		0.545455	2005	Pego 2	10
		-1	2005	Xeresa	11
		0	2005	Xeresa	11
		-0.833333	2005	Xeresa	11
		-1.25	2005	Xeresa	11
		-0.454545	2005	Xeresa	11
		-0.2	2005	Moro	12
		0.111111	2005	Moro	12
		0.142857	2006	Pego	13
		0.571429	2006	Pego	13
		1	2006	Pego	13
		-2.5	2006	Pego	13
		-0.625	2006	Pego	13
		0	2006	Pego	13
		-0.75	2006	Pego	13
		-0.625	2006	Pego	13
		1.5	2007	Pego	14
		1	2008	Pego	15
		-0.333333	2008	Almenara	16
		0	2008	Almenara	16
		-0.25	2008	Almenara	16
		-0.2	2008	Almenara	16
		-0.25	2008	Almenara	16
		0	2008	Almenara	16
		-0.333333	2009	Pego	17
		0.857143	2009	Pego	17
		-0.333333	2009	Moro	18
		0.2	2009	Moro	18
		0.125	2009	Moro	18
