# Supplementary material for: Reproductive success of Whiskered Tern Chlidonias hybrida in eastern Spain in relation to water level variation
Source: PeerJ. 2018 Apr 19;6:e4548. doi: 10.7717/peerj.4548 (PMC5911388; doi:10.7717/peerj.4548)
Supplement: Supplemental Information 3 — Raw data. [file peerj-06-4548-s003.xlsx]

## Sheet: Hoja1
Nº Pairs Chlidonias hybrida
	1985	1986	1987	1988	1989	1990	1991	1992	1993	1994	1995	1996	1997	1998	1999	2000	2001	2002	2003	2004	2005	2006	2007	2008	2009	2010	2011	2012	2013	2014	2015
Almenara marsh	0	0	0			0	0	14	0	0	48	35	58	11	38	43	42	449			15	27	32	134	32	90	50	58	72	20	6
Moros marsh	0	0	20	0	0	0	0	0	75	25	125	108	150	135	141	37	146	134	120	117	119	75	130	200	195	0	40	95	50	0	0
Xeresa marsh	0	0	0	0	30	40	104	110	120	30	30	0	55	27	36	93	68	31	43	11	162	39	43	87	42	59	0	0	0	0	0
Pego-Oliva N.P.	0	0	0	80	35	30	62	25	25	90	0	0	0	0	0	0	133	112	67	102	43	30	38	10	64	29	15	16	60	46	6
Hondo N.P.	120	110	34	100	235	140	216	309	418	72	219	377	1315	670	400	200	51			249	72	142	114	92	528	181	5	908	642	255	602
TOTAL	120	110	54	180	300	210	382	458	638	217	422	520	1578	843	615	373	440	726	230	479	411	313	357	523	861	359	110	1077	824	321	614
